# Supplementary material for: Charge transfer complex formation between organic interlayers drives light-soaking in large area perovskite solar cells
Source: Royal Society of Chemistry journal article supplement (doi:10.1039/d3ee02571c), 2023-01-01
Supplement: d3ee02571c1.pdf [file d3ee02571c1.pdf]

## Supporting Information

### Light-Soaking in Large Area Perovskite Solar Cells Driven by the Formation of Fullerene/BCP Charge Transfer Complexes

Charlie Henderson,<sup>a</sup> Joel Luke,<sup>a</sup> Izabela S. Bicalho,<sup>b</sup> Luiza Correa,<sup>b</sup> Emily J. Yang,<sup>a</sup> Martina Rimmele,<sup>c</sup>  
Harry Demetriou,<sup>d</sup> Yi-Chun Chin,<sup>a</sup> Tianhao Lan,<sup>a</sup> Sandrine Heutz,<sup>d</sup> Nicola Gasparini,<sup>c</sup> Martin Heaney,<sup>c,e</sup>  
Diego Bagnis<sup>b</sup> & Ji-Seon Kim<sup>\*a</sup>

<sup>a</sup> Department of Physics and Centre for Processable Electronics, Imperial College London, London SW7 2AZ, UK

Email: [ji-seon.kim@imperial.ac.uk](mailto:ji-seon.kim@imperial.ac.uk)

<sup>b</sup> Oninn, Av. José Cândido da Silveira 2000 - Horto Florestal, Belo Horizonte, MG31035-536, Brazil

<sup>c</sup> Department of Chemistry and Centre for Processable Electronics, Imperial College London, London W12 0BZ, UK

<sup>d</sup> Department of Materials and Centre for Processable Electronics, Imperial College London, London SW7 2AZ, UK

<sup>e</sup> KAUST Solar Center, Physical Science and Engineering Division, King Abdullah University of Science and Technology (KAUST), Thuwal, 23955-6900 Saudi Arabia

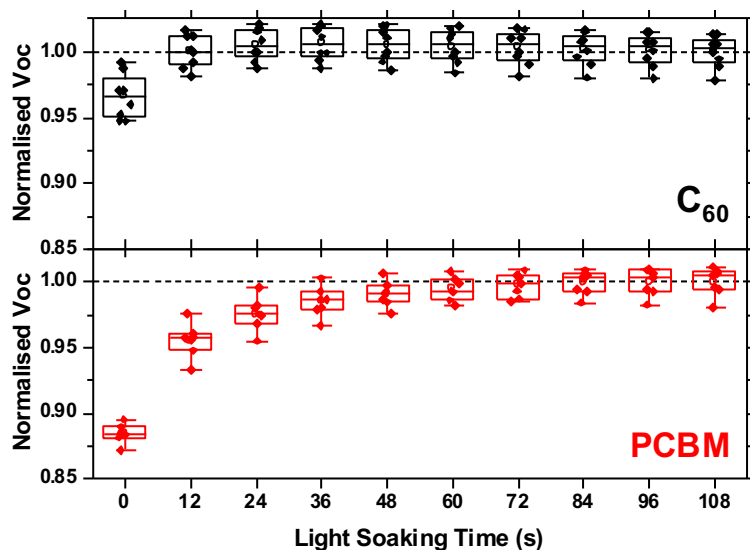

Figure S1: Change in  $V_{OC}$  over time for ITO/NiO/MAPbI<sub>3</sub>/Fullerene/BCP/Ag devices under 1 Sun Illumination.

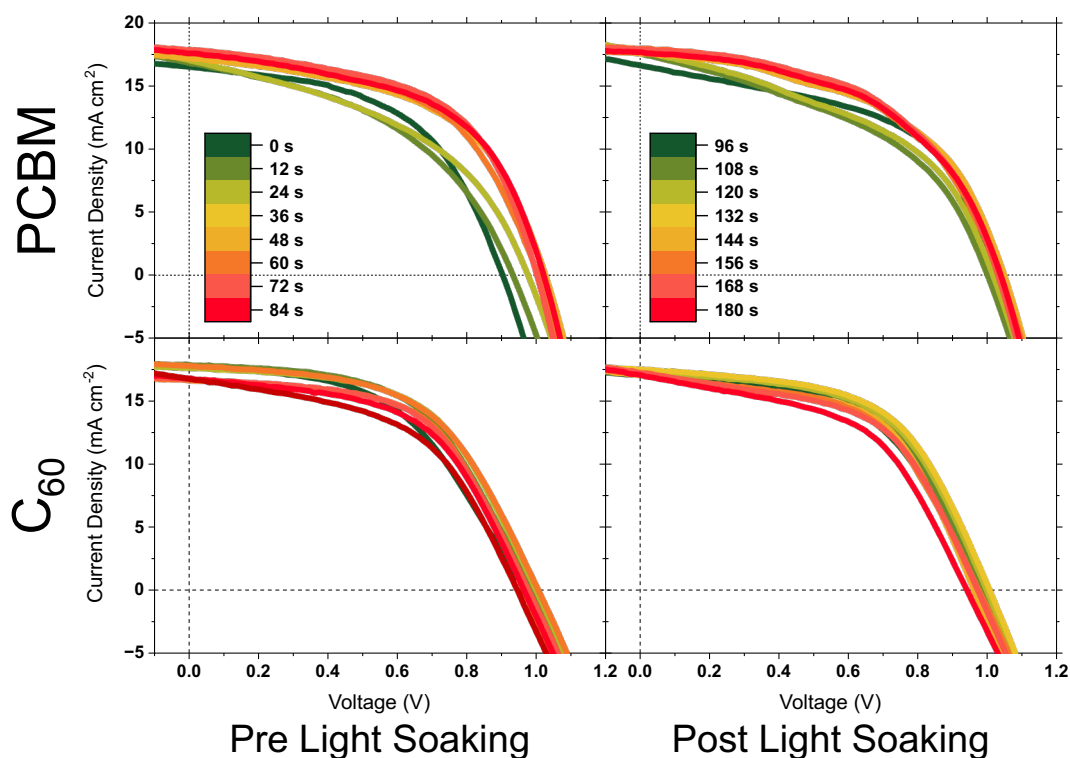

Figure S2: 1 Sun J/V characteristics of ITO/NiO/MAPbI<sub>3</sub>/Fullerene/BCP/Ag devices before and after light soaking. Each device was comprised of 8 pixels which were scanned sequentially such that in the pre light soaking scans ‘Pixel 8’ had been exposed to illumination for ~80 s before measurement. Legend shows the time under illumination prior to testing for each measurement.

|                          |                | <b>V<sub>OC</sub> (V)</b> | <b>J<sub>SC</sub> (mA cm<sup>-2</sup>)</b> | <b>FF</b>              | <b>PCE (%)</b>        |
|--------------------------|----------------|---------------------------|--------------------------------------------|------------------------|-----------------------|
| <b>PC<sub>61</sub>BM</b> | <b>Pre LS</b>  | 1.00                      | 16.58                                      | 0.581                  | 9.62                  |
|                          | <b>Post LS</b> | 1.08<br>(1.09±0.01)       | 16.85<br>(17.37±0.37)                      | 0.572<br>(0.572±0.028) | 10.44<br>(10.25±0.39) |
| <b>C<sub>60</sub></b>    | <b>Pre LS</b>  | 1.02                      | 18.40                                      | 0.522                  | 9.84                  |
|                          | <b>Post LS</b> | 1.03<br>(0.98±0.01)       | 17.67<br>(17.21±0.17)                      | 0.539<br>(0.550±0.012) | 9.81<br>(9.30±0.34)   |

Table S1: Performance parameters of representative ITO/NiO/MAPbI<sub>3</sub>/Fullerene/BCP/Ag PSCs before and after light soaking for ~100 s. Given in parentheses are the average values of the performance parameters of ≥8 pixels, with standard deviations, after LS.

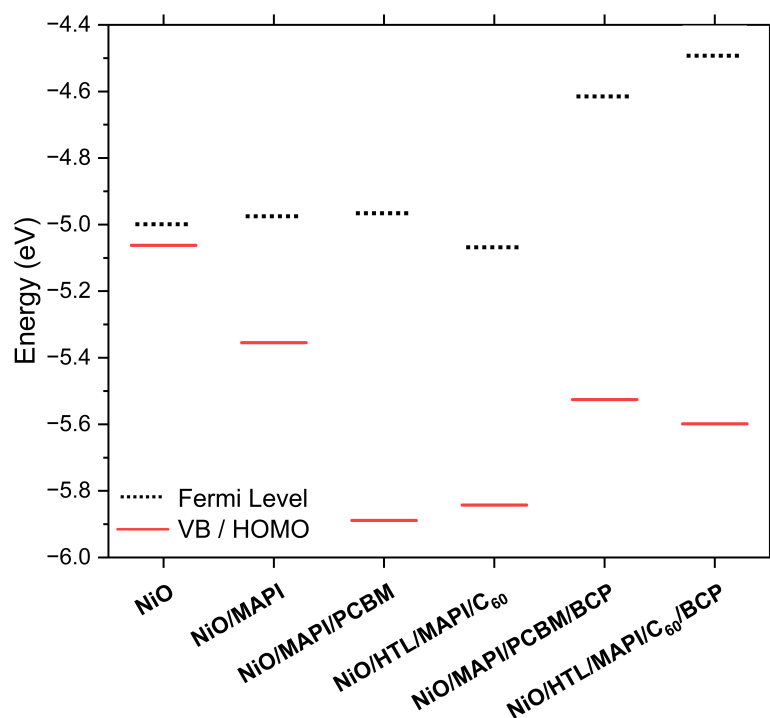

Figure S3: Results of energetic measurements of partial device stacks – both  $E_F$  and VB/HOMO level measurements are highly surface sensitive so the values are most influenced by the final layer.  $E_F$  measurements were taken prior to SPV and VB/HOMO level measurements were taken following SPV acquisition.

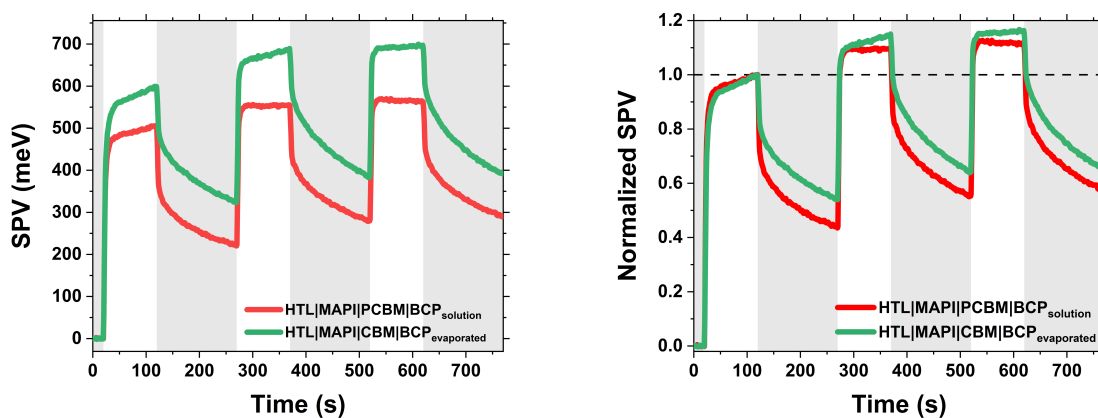

Figure S4: Raw and normalised transient SPV responses of ITO/NiO/MAPbI<sub>3</sub>/PCBM/BCP samples with 10 nm thick solution processed BCP (red) and 5 nm thick evaporated BCP (green).

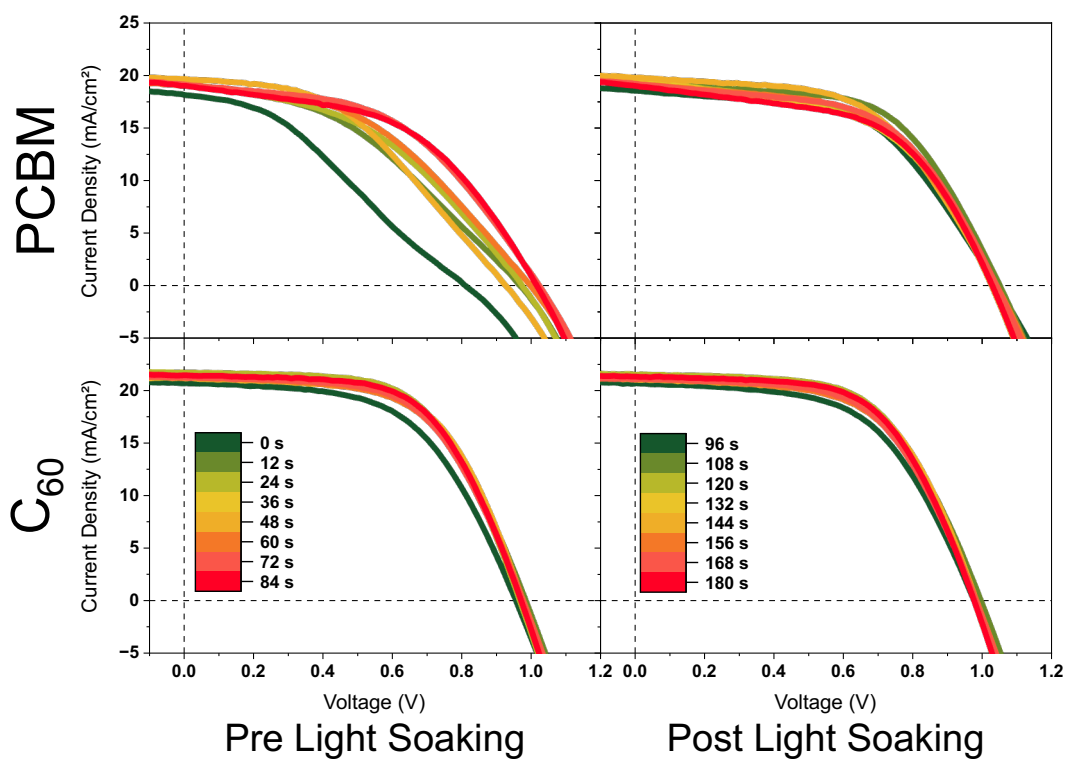

Figure S5: 1 Sun J/V characteristics of ITO/NiO/Cs<sub>x</sub>FA<sub>1-x</sub>PbI<sub>3</sub>/Fullerene/BCP/Ag devices before and after light soaking. Each device was comprised of 8 pixels which were scanned sequentially such that in the pre light soaking scans 'Pixel 8' had been exposed to illumination for ~80 s before measurement. Legend shows the time under illumination prior to testing for each measurement.

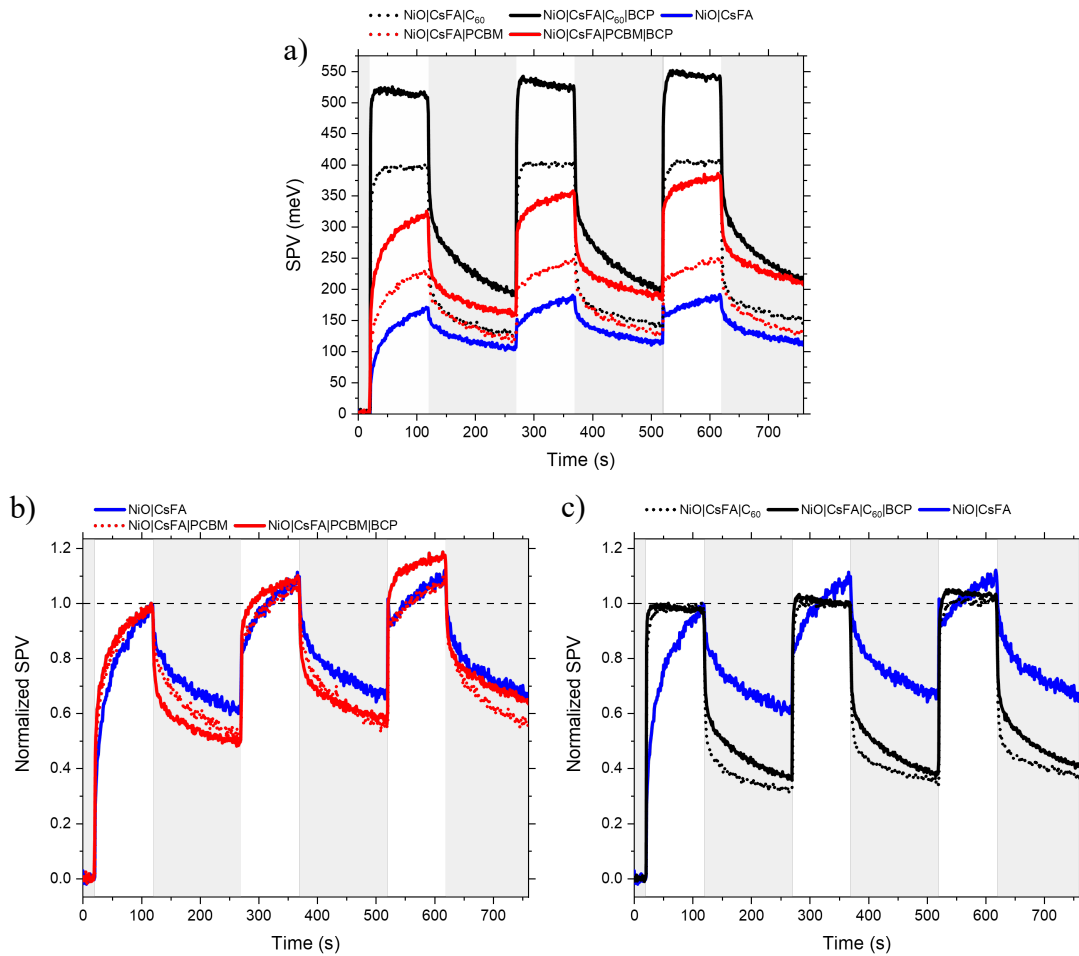

Figure S6: Raw (a) and normalised (b,c) SPV responses of samples with the same structures as in Figure 2, utilising a  $\text{Cs}_x\text{FA}_{1-x}\text{PbI}_3$  photoactive layer in place of  $\text{MAPbI}_3$ .

**Discussion of  $\text{Cs}_x\text{FA}_{1-x}\text{PbI}_3$  SPV:** Interpretation of the SPV response of the  $\text{Cs}_x\text{FA}_{1-x}\text{PbI}_3$  perovskite is complicated by the slow turn on characteristics intrinsic to this particular perovskite (detailed on page 9 of the main text). This effect is very significant in the  $\text{Cs}_x\text{FA}_{1-x}\text{PbI}_3$ ,  $\text{Cs}_x\text{FA}_{1-x}\text{PbI}_3/\text{PCBM}$ , and  $\text{Cs}_x\text{FA}_{1-x}\text{PbI}_3/\text{PCBM}/\text{BCP}$  samples when compared to their MAPI counterparts (Fig. 2). The origin of this is unclear but is possibly related to the multi-cation composition of the perovskite resulting in changes to the surface chemistry. At short times (i.e. during the first cycle) the effect of the BCP LS effect is masked by the changes at the  $\text{Cs}_x\text{FA}_{1-x}\text{PbI}_3/\text{PCBM}$  interface. Figure S6b shows the SPV response normalised to the SPV signal at the end of the first cycle ( $t=120$  s). We interpret the increased relative SPV signal from the PCBM/BCP sample in the second and third cycles as evidence for light induced interaction between PCBM and BCP becoming resolvable from the perovskite induced slow process.

To further quantify these changes, we have fitted the slow turn-ons of the  $\text{Cs}_x\text{FA}_{1-x}\text{PbI}_3/\text{PCBM}$  based perovskite samples using a bi-exponential growth equation (Equation S1) where  $\tau$  is the exponential lifetime,  $t$  is time in seconds after time = 0 ( $t_0$ ),  $A$  is the pre-exponential factor and SPV is the SPV intensity in meV.

$$SPV(t) = SPV_0 + A_1 e^{-(t-t_0)/\tau_1} + A_2 e^{-(t-t_0)/\tau_2} \quad (\text{Equation S1})$$

The results of these fittings for the first illumination cycle are shown below. As can be seen the introduction of BCP onto the  $Cs_xFA_{1-x}PbI_3/PCBM$  sample results in an increase in both the  $t_1$  and  $t_2$  lifetimes.

The intrinsic differences between the two perovskite compositions used in this study make direct comparison of the SPV results complex. However, the data presented in Figures 2, S6 and S7 supports the primary finding of the SPV portion of the study – that addition of the BCP layer to the PCBM samples introduces an additional slow process which slows the growth of the SPV magnitude.

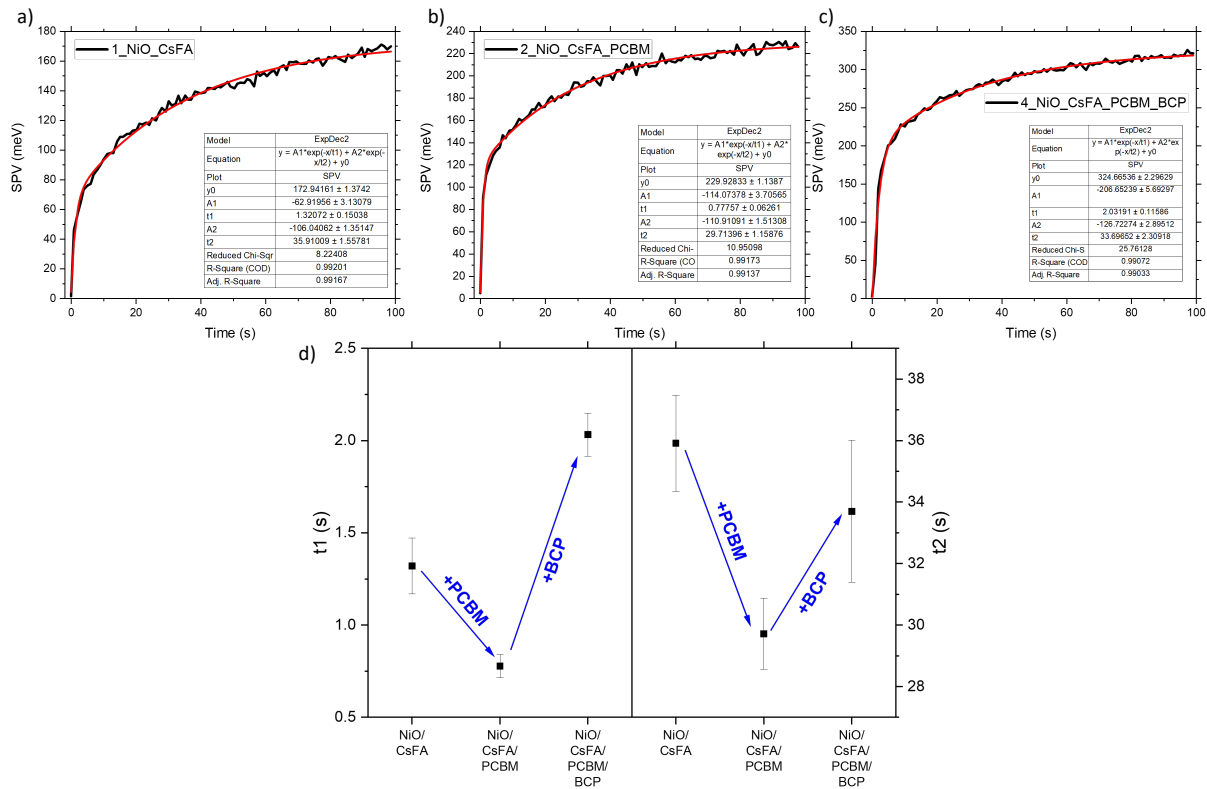

Figure S7: Fitted first cycle SPV responses, shown in Fig. S6, of a) ITO/NiO/ $Cs_xFA_{1-x}PbI_3$ , b) ITO/NiO/ $Cs_xFA_{1-x}PbI_3/PCBM$ , and c) ITO/NiO/ $Cs_xFA_{1-x}PbI_3/PCBM/BCP$  samples. d) shows the extracted  $t_1$  and  $t_2$  lifetimes of each sample.

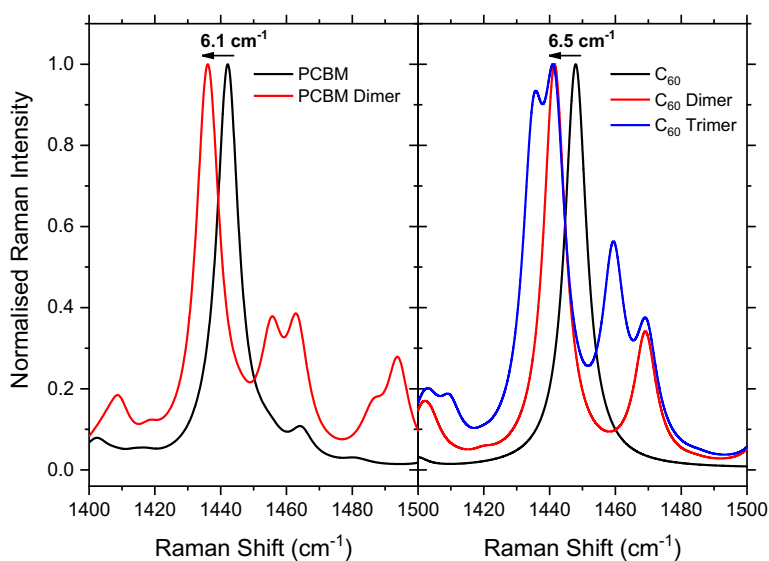

Figure S8: Simulated Raman spectra of PCBM (left) and  $C_{60}$  (right) molecules (black lines), dimers (red lines) and  $C_{60}$  trimers (blue line). Simulations carried out using DFT after molecular geometry optimisation.

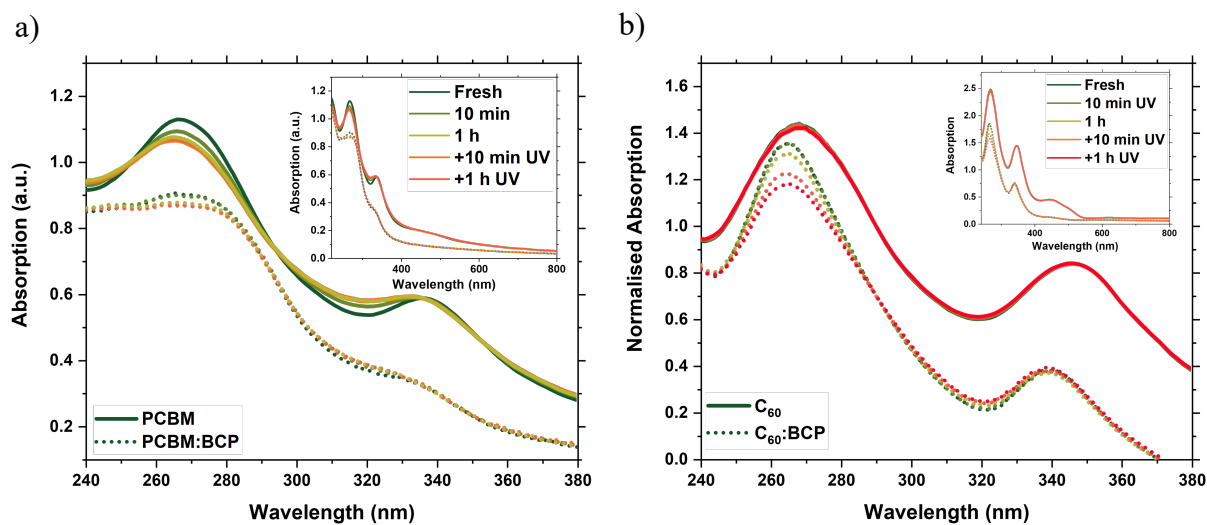

Figure S9: Absorption Spectra of neat fullerene (solid lines) and fullerene/BCP blend films (dashed lines) of a) PCBM and b)  $C_{60}$  during 1 Sun and 365 nm accelerated aging.

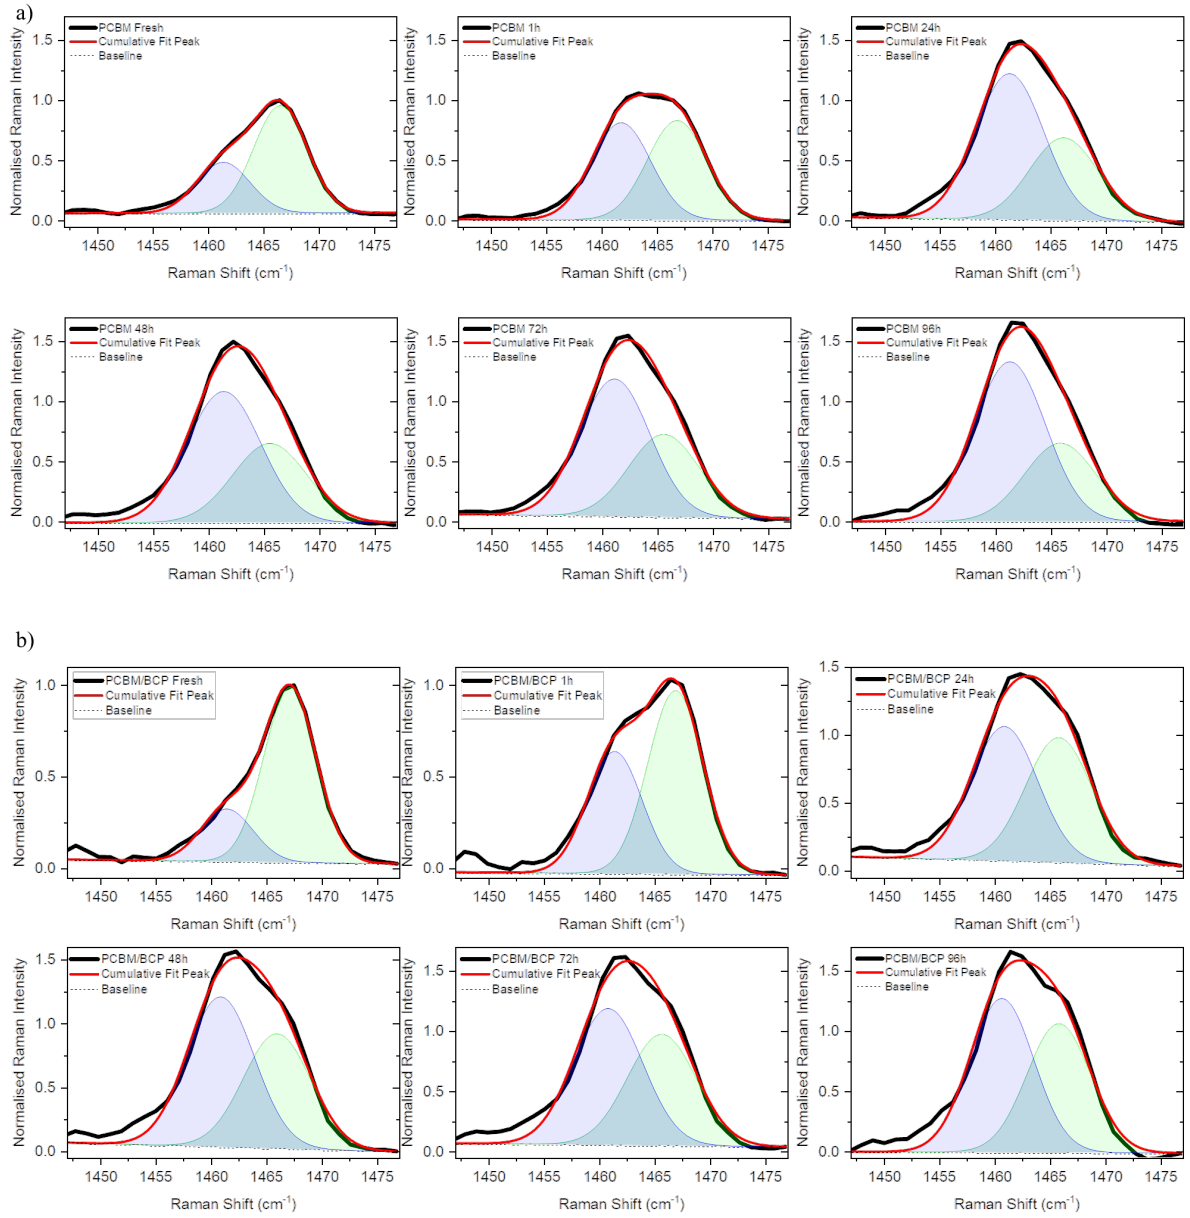



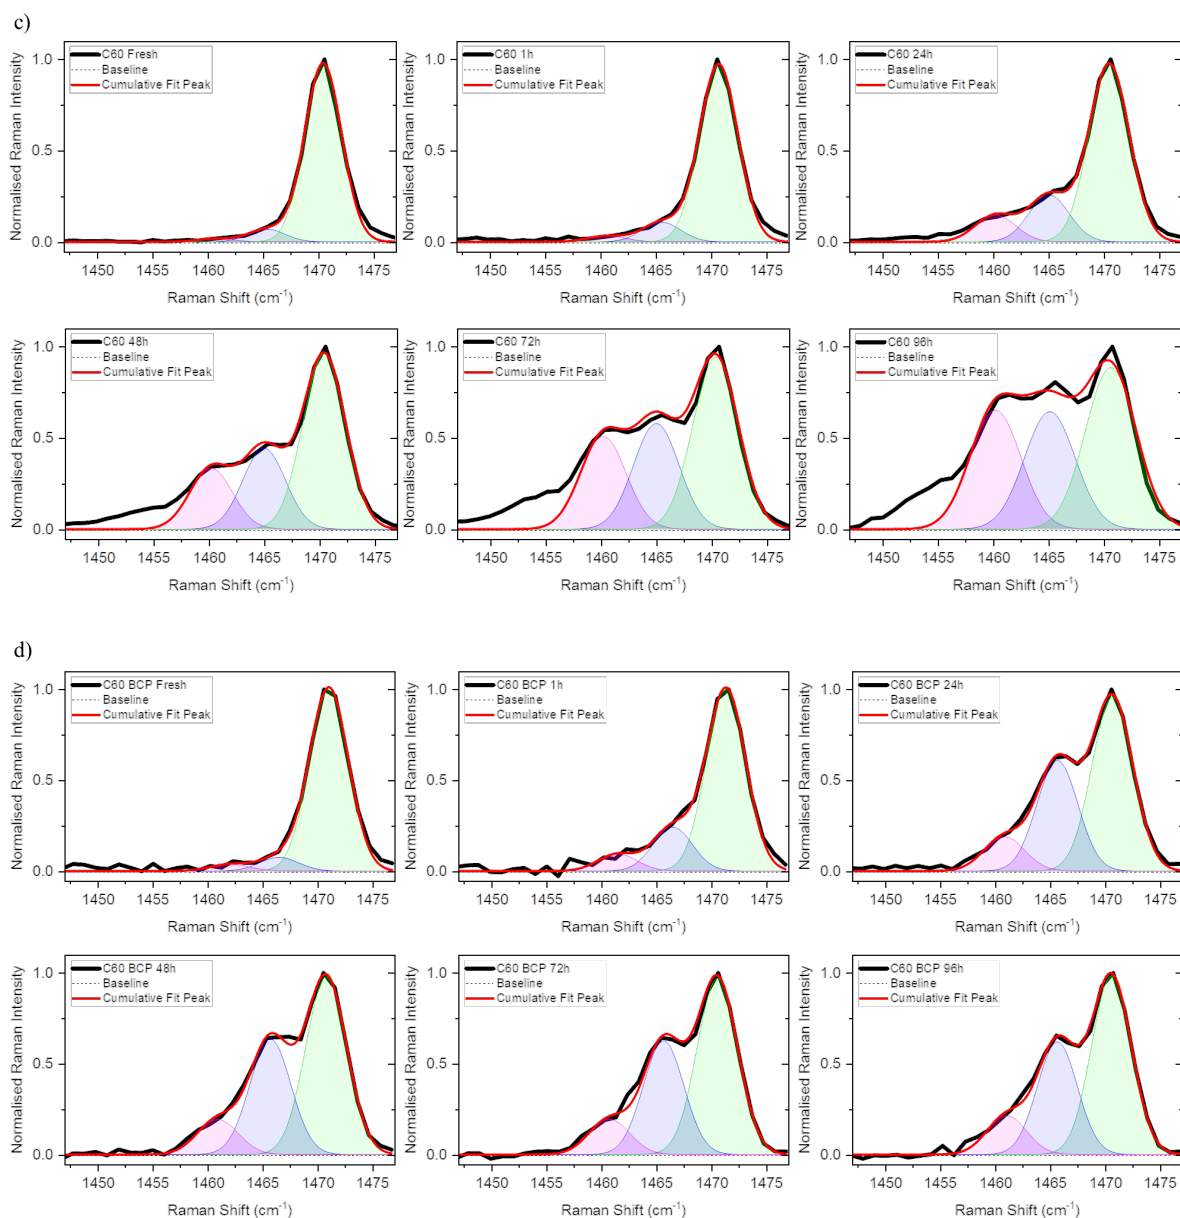

Figure S10: Deconvoluted Gaussian peak fittings of the Raman spectra shown in Figure S3 for a) PCBM, b) PCBM/BCP, c)  $C_{60}$  and d)  $C_{60}$ /BCP films. Green peaks are assigned to the  $A_g$  Raman modes of PCBM/ $C_{60}$  molecules, blue peaks to dimers and pink peaks to  $C_{60}$  trimers. Raman spectra are normalised to the intensity of the higher energy, monomer peak.

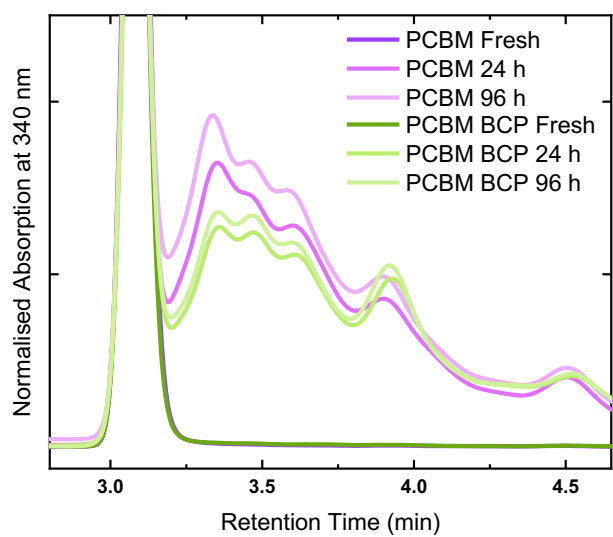

Figure S11: HPLC analyses normalised to the monomer signal at 340 nm of re-dissolved PCBM and PCBM/BCP films aged in 1 Sun conditions under an  $N_2$  atmosphere.

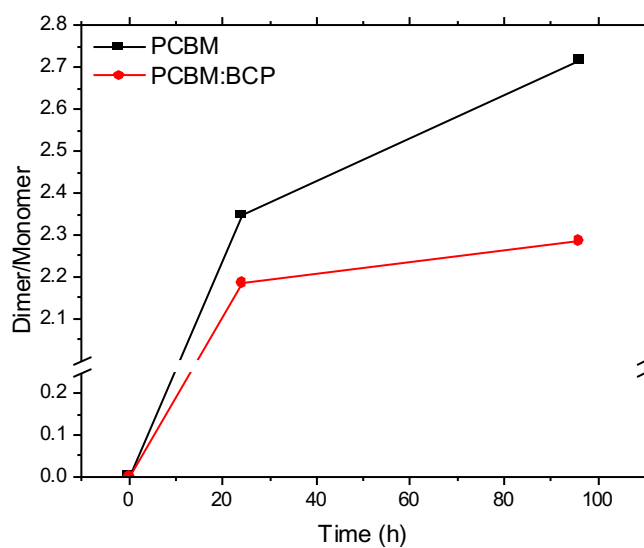

Figure S12: Dimer/Monomer peak area ratios extracted by integrating the respective areas of the HPLC analyses shown in Fig. S11.

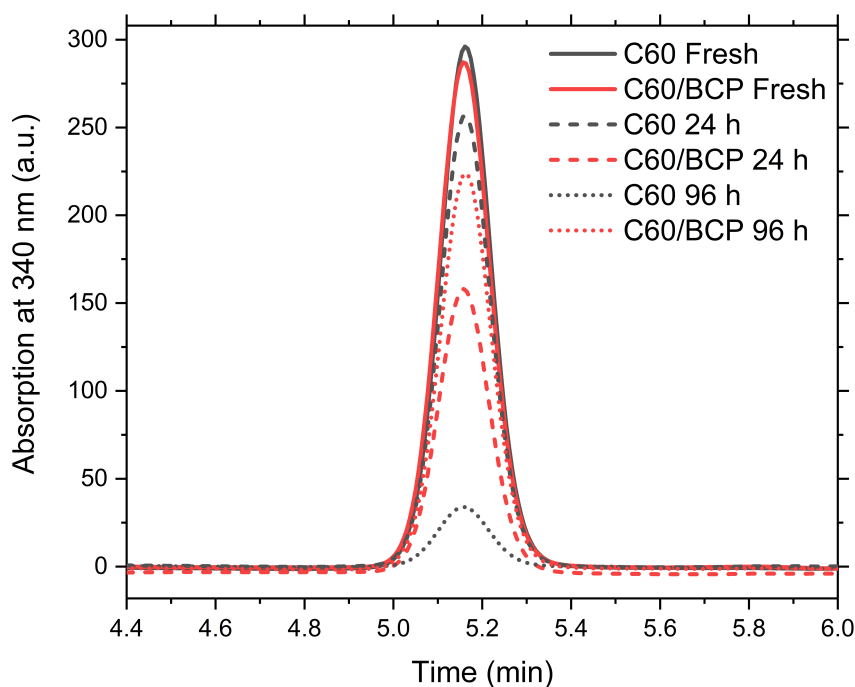

Figure S13: HPLC analyses of dissolved  $C_{60}$  and  $C_{60}$ /BCP films aged in 1 Sun conditions under an  $N_2$  atmosphere.

**Discussion of HPLC Analyses:** PCBM/PCBM dimers appear in the light soaked PCBM films as additional absorption peaks at longer retention times than the main PCBM peak (Fig. S11).<sup>1</sup> The occurrence of a broad signal for the dimers can be attributed to the formation of different regioisomers, which leads to differences in retention time.<sup>1,2</sup> HPLC analysis was also carried out on dissolved  $C_{60}$  and  $C_{60}$ :BCP films, with the analyses shown in Figure S10. No evidence of dimer or oligomer formation is observed, however this may be due to the poor solubility of  $C_{60}$  leaving the concentration of dimers below the limit-of-detection of the instrument. This is supported by the intensity of the main fullerene absorption peak in the fresh  $C_{60}$  analyses being ~10% of the peak in the PCBM analyses. When comparing the intensities of the absorption peaks of the HPLC analyses of the  $C_{60}$  and  $C_{60}$ :BCP films a clear decrease is observed in peak intensity upon LS, suggesting that molecular  $C_{60}$  is becoming less concentrated in the analyte solution. This effect is more pronounced in the neat  $C_{60}$  samples than in the  $C_{60}$ :BCP blend, with the 96 h light soaked  $C_{60}$  peak dropping to 11% of the intensity of the fresh  $C_{60}$  peak. As already discussed, the  $C_{60}$  films (particularly those which had undergone aging) exhibited poor solubility. This hindered further interpretation of the HPLC analyses due to the difficulty deconvoluting the contributions of products and contaminants.

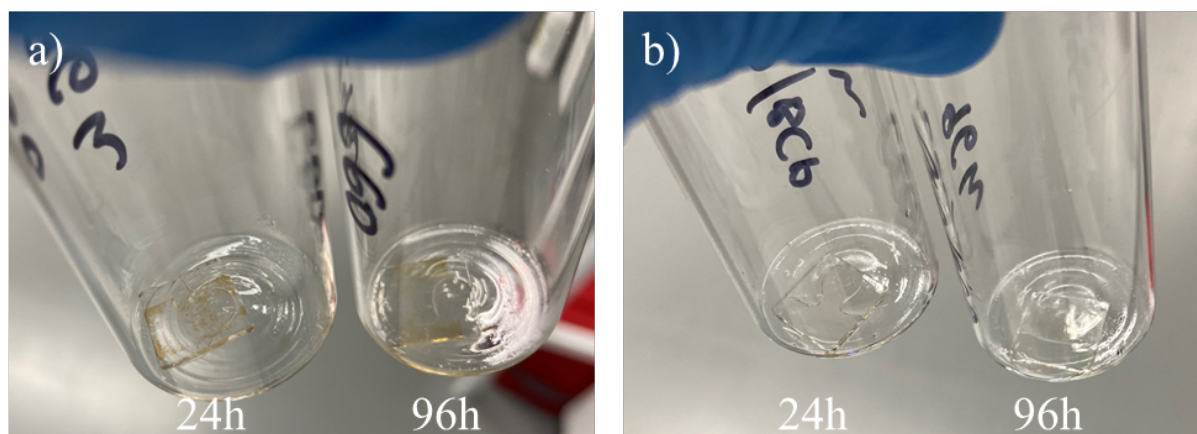

Figure S14: Photographs showing 24h (left) and 96h (right) a)  $C_{60}$  and b)  $C_{60}/BCP$  films following submersion in toluene.

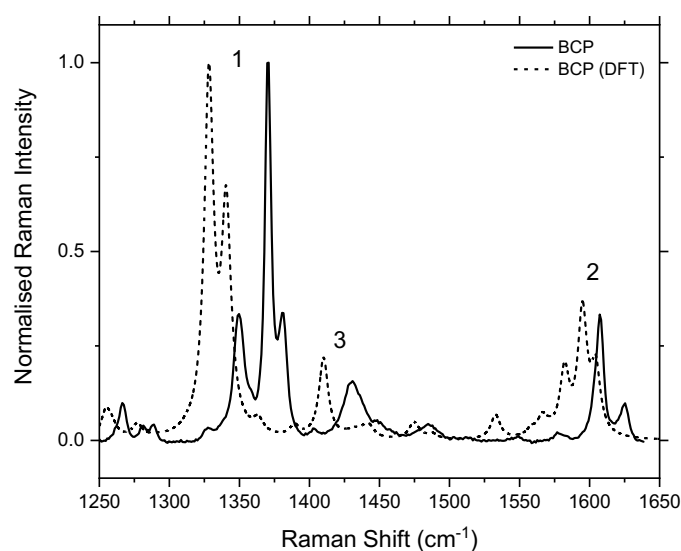

Figure S15: Experimental (solid line) and simulated (dashed line) Raman spectra of BCP.

| Peak | Experimental Raman Shift ( $cm^{-1}$ ) | Simulated Raman Shift ( $cm^{-1}$ ) | Assignment                                             |
|------|----------------------------------------|-------------------------------------|--------------------------------------------------------|
| 1    | 1370                                   | 1328                                | Phenanthroline $a_1$ (intra pyridine ring C-C stretch) |
| 2    | 1607                                   | 1595                                | Phenyl $e_{2g}$ (intra ring C-C stretch)               |
| 3    | 1430                                   | 1409                                | Phenanthroline $b_1$ (inter pyridine ring C-C stretch) |

Table S2: Raman peak shifts and assignments for the spectra shown in S15, assignments for phenanthroline modes made with the assistance of Reiher et al.<sup>3</sup>

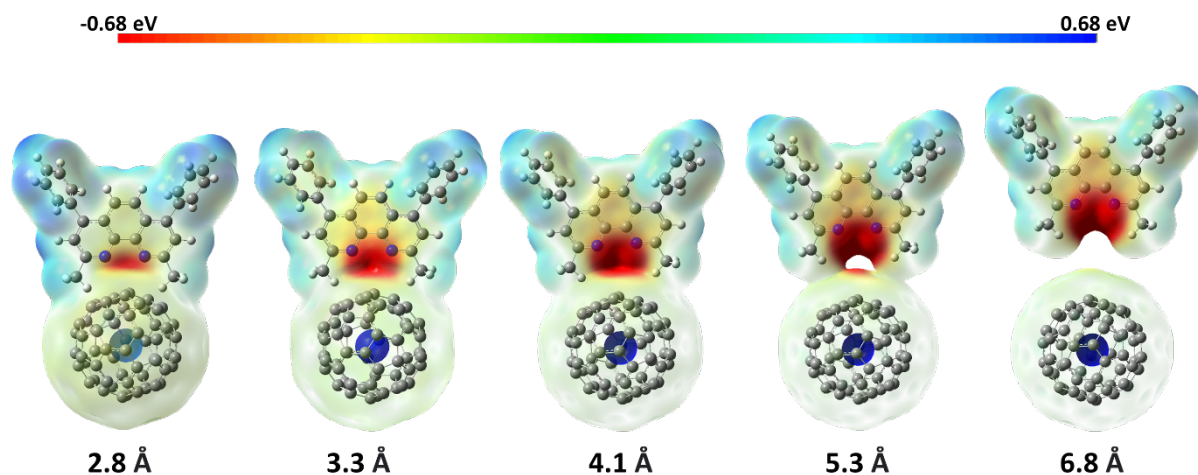

Figure S16: Electrostatic potential (ESP) maps of BCP and  $C_{60}$  molecules at increasing intermolecular distances. The distance given below each map refers to the distance between the closest BCP nitrogen and  $C_{60}$  carbon atoms. ESP calculates the energy of the repulsive (positive) or attractive (negative) force experienced by a positive point charge in close proximity to the molecule. Note the change in potential over the whole  $C_{60}$  molecule as the intermolecular spacing decreases, indicating increased electron density on the  $C_{60}$  at small spacings.

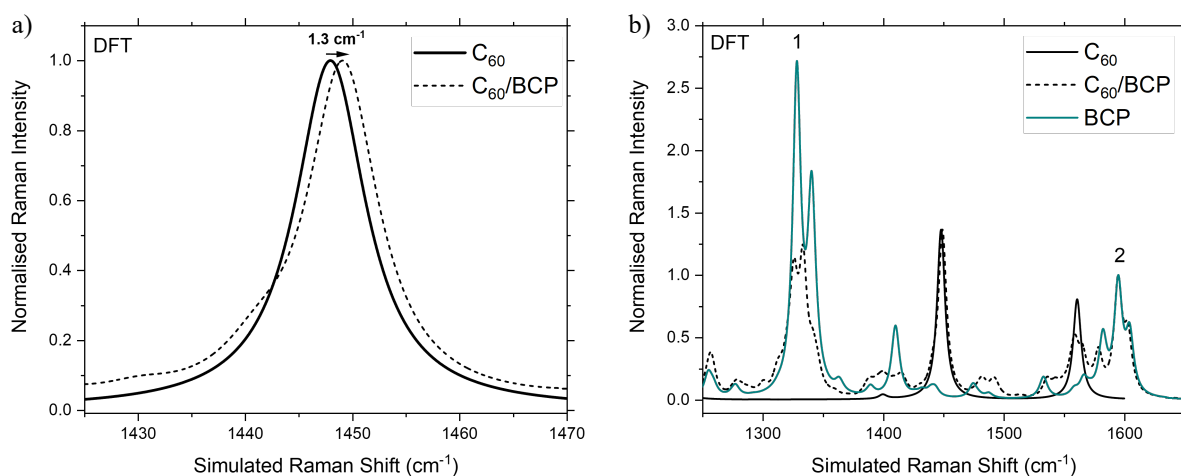

Figure S17: Simulated Raman spectra of  $C_{60}$ , BCP, and the 2.8 Å spacing  $C_{60}$ /BCP CT complex shown in Figure S15. a) 50  $\text{cm}^{-1}$  wide region of the spectra showing the fullerene peaks only, b) 400  $\text{cm}^{-1}$  wide region showing the fullerene and BCP peaks (normalised to 'Peak 2').

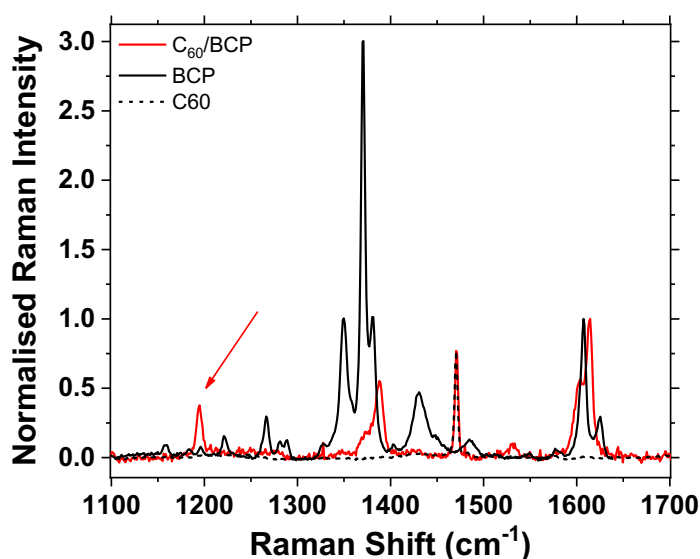

Figure S18: Raman spectra of fresh BCP (black), C<sub>60</sub>/BCP blend (red) and C<sub>60</sub> (black dashed) films. Upon aging under 1 Sun conditions no changes in the shift, FWHM or relative intensity of the peak at 1195 cm<sup>-1</sup> are observed.

**Discussion of Possible BCP/C<sub>60</sub> Adduct Formation:** The appearance of a new Raman peak at 1195 cm<sup>-1</sup> (the C-N bond region)<sup>4</sup> suggests that an adduct of C<sub>60</sub> and BCP may be forming spontaneously in the blend (Fig. S17). We have previously reported spontaneous C<sub>60</sub> adduct formation with a planar acceptor molecule (MPTA) containing a tertiary pyrrole nitrogen.<sup>5</sup> However, increased relative intensity of a small BCP peak in the same position cannot be ruled out, therefore, on balance, non-covalent CT complex formation is a more likely cause.

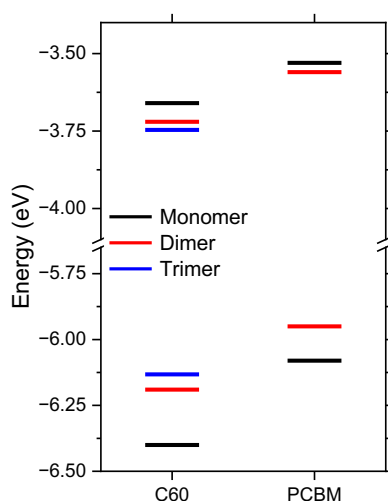

Figure S19: Simulated frontier molecular orbital energies of C<sub>60</sub> (left) and PCBM (right) monomers (black), dimers (red) and trimers (blue). Simulations carried out using DFT after molecular geometry optimisation.

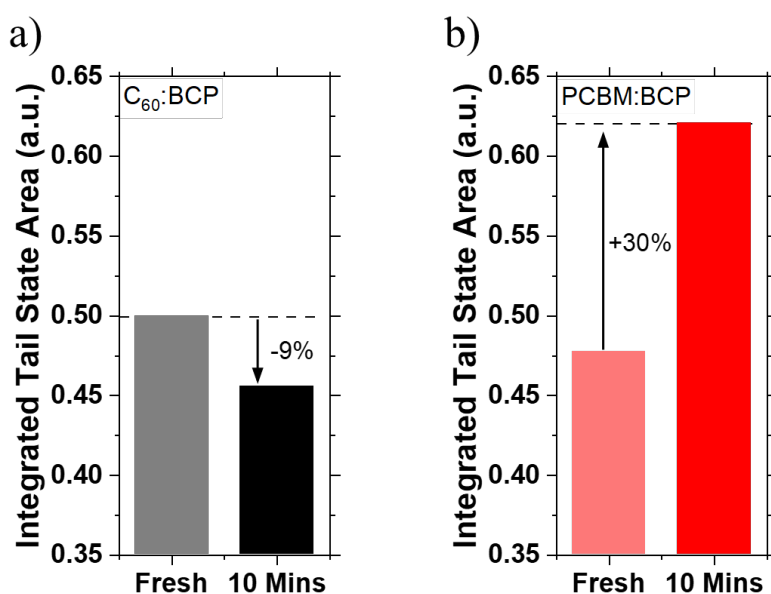

Figure S20: Integrated tail state areas before and after 10 mins LS of APS spectra shown in Figures 5a, 5b. a) C<sub>60</sub>:BCP and b) PC<sub>61</sub>BM:BCP.

## References

- 1 T. Heumueller, W. R. Mateker, A. Distler, U. F. Fritze, R. Cheacharoen, W. H. Nguyen, M. Biele, M. Salvador, M. von Delius, H.-J. Egelhaaf, M. D. McGehee and C. J. Brabec, *Energy Environ. Sci.*, 2016, **9**, 247–256.
- 2 A. Distler, T. Sauermann, H.-J. Egelhaaf, S. Rodman, D. Waller, K.-S. Cheon, M. Lee and D. M. Guldi, *Adv. Energy Mater.*, 2014, **4**, 1300693.
- 3 M. Reiher, G. Brehm and S. Schneider, *J. Phys. Chem. A*, 2004, **108**, 734–742.
- 4 J. E. Stewart, *J. Chem. Phys.*, 1959, **30**, 1259–1265.
- 5 C. Labanti, J. Wu, J. Shin, S. Limbu, S. Yun, F. Fang, S. Y. Park, C. Heo, Y. Lim, T. Choi, H.-J. Kim, H. Hong, B. Choi, K. Park, J. R. Durrant and J. Kim, *Nat. Commun.*, 2022, **13**, 3745.
